# Supplementary material
Source: HighWire-hosted journal article supplement (https://bmjopenquality.bmj.com/highwire/filestream/143047/field_highwire_adjunct_files/1/bmjoq-2021-001624supp002_data_supplement.pdf)
Supplement: bmjoq-2021-001624supp002_data_supplement.pdf [file bmjoq-2021-001624supp002_data_supplement.pdf]

## Sepsis

SEPSIS MANAGEMENT  
Overview Report  
Huddle Documenten...  
Fluid exclusion  
Progress Note  
Transfer sepsis d...  
Order Sets  
Orders  
BestPractice

## Sepsis Overview Report

## ✧ Fluid Resuscitation Summary ↗

Report

ID Vitals and Labs (Since Date of Admission)

24h Max

Temp (°C)

Heart Rate

Resp

BP

No lab results data found

## FLUID RESUSCITATION MEDS

Medication

Ordered Dose/Rate, Route, Frequency

Last Action

## 🔗 Lab Results ↗

Report

(Up to last 2 results from the past 24 hours)

None

## 📅 Sepsis Management

Sepsis Management (Timeline) ↗

## 📅 Sepsis Narrator Timeline

Sepsis Narrator Timeline

## 📅 Huddle Documentation

## 📅 Fluid exclusion documentation ✎

+ New Reading

No data found.

Flowsheets ↗

## 📅 Progress Note ✎

+ Create Note

1 Peds Sepsis

2 Fluid Reassessment

3 IBW Language

📄 See All Notes

🔄 Refresh

No notes of this type filed.

## 📅 Transfer Documentation ✎

+ New Reading

No data found.

Flowsheets ↗

## 📅 Order Sets ✎

Search for new Order Set

+ Add

Suggestions

☐ GEN SEPSIS ADULT

✔ Open Order Sets

✖ Clear Selection

✖ Remove Open
